# Supplementary material for: Early Child Development Assessments and Their Associations with Long-Term Academic and Economic Outcomes: A Systematic Review
Source: MDPI journal article supplement (doi:10.3390/ijerph18041538), 2021-02-05
Supplement: s1 [file s1]

## **SUPPLEMENTAL DOCUMENT 1.**

The decision to consider only manuscripts published in 1990 or later was made after consideration of available early childhood development tools and research methodology.

Three prominent developmental assessment tools in use currently across the globe were either developed or updated and re-normed from their first version around this time. This includes the Bayley Scales of Infant Development, which was initially developed in 1969 but updated and re-normed in 1993 (Bayley II), the Mullen Scales of Early Learning, which was published in 1985, and the Griffiths Mental Development Scales, which were originally developed in 1970 but updated and validated in 1996. It was also important to the goal of the study that early childhood development assessment tools included were still in use and could be validly implemented if found to show longitudinal predictive ability.

The past 3 decades have also seen a significant improvement in research study quality, including larger sample sizes, more sophisticated modeling techniques, improved recognition of and adherence to research ethics, and stricter publication requirements. Although somewhat arbitrary, together these factors lead the team to cut the search at the January 1 1990.

## SUPPLEMENTAL DOCUMENT 2. PubMed, PyscINFO, and ERIC database search strings

### PUBMED SEARCH

("Swedish Communicative Development Inventory III"[tw] OR "Kindergarten Student Entrance Profile-Adapted Version"[tw] OR "Environmental Symbols Instrument"[tw] OR "Representational Knowledge Assessment"[tw] OR "SEEK Observational Instrument"[tw] OR "Nonword Reading Task"[tw] OR "Kindergarten Readiness Checklist-Chinese Version"[tw] OR "Object-based Pattern Reasoning Assessment"[tw] OR "Australian English Communicative Development Inventory"[tw] OR "Child Performance Skills Questionnaire-Adapted"[tw] OR "Brief Early Skills and Support Index"[tw] OR "Picture Arrangement Test-Adapted Version"[tw] OR "Developmental Vocabulary Assessment for Parents"[tw] OR "Reading Strategy Performance Tests"[tw] OR "Functional Literacy Experience Scale based upon Ecological Theory"[tw] OR "Preschool Screening Measure"[tw] OR "Early Motor Questionnaire"[tw] OR "Comprehensive Test of Phonological Processing-Second Edition"[tw] OR "Letter Names Measure"[tw] OR "Brief Reading Rating Scale"[tw] OR "Brief Infant-Toddler Social and Emotional Assessment-Dutch Version"[tw] OR "Infant Toddler Home Observation for Measurement of the Environment-Adapted Version"[tw] OR "Semantic Verbal Fluency Measure"[tw] OR "P1 Reading Assessments"[tw] OR "Reading Rating Form"[tw] OR "Colorado Learning Difficulties Questionnaire"[tw] OR "Reading Comprehension Test for Turkish Students"[tw] OR "Early Childhood Screening Assessment"[tw] OR "Woodcock-Johnson III Tests of Cognitive Abilities-Brazilian Version"[tiab] OR "Screening Instrument for 3-Year-Olds"[tw] OR "BRIGANCE Comprehensive Inventory of Basic Skills II"[tw] OR "Lucknow Development Screen"[tiab] OR "Screening Test for the Early Prediction of School Success"[tw] OR "Screening Test for the Early Prediction of School Success"[tw] OR "Capute Scales"[tw] OR "Middle-Childhood Home Observation for Measurement of the Environment Subscales"[tw] OR "Merrill-Palmer-Revised Scales of Development"[tiab] OR "Woodcock Diagnostic Reading Battery"[tiab] OR "Brief Academic Competence Evaluation Screening System"[tw] OR "Kindergarten Behavior Rating Scale"[tw] OR "Child Evaluation Measure"[tw] OR "Stoelting Brief Intelligence Test"[tiab] OR "Cassle-DeMoulin Child Development Age Scale"[tiab] OR "Icelandic Parent Report Checklist"[tw] OR "Infant-Toddler Development Assessment"[tw] OR "Icelandic Parent Development Inventory"[tw] OR "Computerized Neurocognitive Battery"[tw] OR "Child Development Inventory"[tw] OR "Parent Report Instrument"[tw] OR "Home Observation Measurement of the Environment Inventory-Elementary Version"[tw] OR "Teacher's Report Form"[tw] OR "Home Environment Questionnaire"[tw] OR "Preschool Rating Scale for Teachers"[tw] OR "Hayes Early Identification Listening Response Test"[tiab] OR "Preschool Screener"[tw] OR "Utrecht"[tiab] OR "Early Arithmetic, Reading and Learning"[tw] OR "Early Arithmetic Reading and Learning"[tw] OR "Mathematical Ability Instrument\*"[tw] OR "Early Mathematics Assessment\*"[tw] OR "iPad"[tiab] OR "iPad Early Mathematics Assessment\*"[tw] OR "Nine-Card"[tw] OR "MindStreams"[tw] OR "Mind Streams"[tw] OR "tempe"[tiab] OR "Head-Toes-Knees-Shoulders"[tw] OR "Executive Function Scale"[tw] OR "Wisconsin Card"[tw] OR "Behavioral Rating Inventory"[tw] OR "Child Behavior Rating Scale"[tw] OR "Hayling"[tw] OR "Attention and Impulse"[tw] OR "Emotional Regulation Checklist"[tw] OR "Dimensional Change Card Sort"[tiab] OR "Family Life Project"[tiab] OR "Differential Abilities Scale\*"[tw] OR "Batelle Development Inventory"[tw] OR "Rapid Neurodevelopment Assessment\*"[tw] OR "RNDA"[tw] OR "Kilifi Developmental Inventory"[tw] OR "Kilifi Communicative Development Inventories"[tw] OR "KDI"[tw] OR "Malawi Developmental Assessment Tool"[tw] OR "MDAT"[tw] OR "Ten Question Questionnaire\*"[tw] OR "Ten Questions Questionnaire\*"[tw] OR "International Guide for Monitoring Child Development"[tw] OR "Griffiths Mental Development Scales"[tw] OR GMDS[tw] OR (Griffiths[tiab] AND scale\*[tw]) OR "Wechsler Preschool"[tw] OR (wechsler[tw] AND scale\*[tw]) OR "Stanford Binet"[tw] OR "Bracken Basic Concept Scale"[tw] OR "Peabody Picture Vocabulary Test"[tw]

OR "Expressive Vocabulary Test"[tw] OR "Preschool Language Scale\*"[tw] OR "Receptive One-Word Picture Vocabulary Test\*"[tw] OR "Expressive One-Word Picture Vocabulary Test\*"[tw] OR "Child Behavior Checklist"[tw] OR "CBCL"[tw] OR "Behavior Assessment System"[tw] OR "BASC"[tw] OR (Conners Comprehensive Behaviour Rating Scale\*) OR (Conners Comprehensive Behavior Rating Scale\*) OR (conners[tiab] AND rating[tiab] scale\*[tiab]) OR CBRS[tw] OR "Strengths and Difficulties Questionnaire"[tw] OR SDQ[tw] OR (vanderbilt[tiab] AND assessment[tiab] AND scale\*) OR (nichq AND (scale\* OR assessment)) OR "Behavior Rating Inventory of Executive Function"[tw] OR (Developmental[tiab] AND neuropsychological[tiab] AND Assessment[tiab]) OR NEPSY[tw] OR "Bracken School Readiness Assessment"[tw] OR (bracken[tiab] NOT (fern[tw] OR Pteridium[tw] OR bracken[au])) OR "BSRA"[tw] OR "Bracken Basic Concept Scale"[tw] OR BBCS[tw] OR (abc[tiab] AND inventor\*[tiab]) OR "Ages and Stages Questionnaire"[tw] OR ASQ[tw] OR ("ages and stages"[tw] AND questionnaire\*[tw]) OR "EASQ"[tw] OR "Extended ASQ"[tw] OR "Parents Evaluation of Developmental Status"[tw] OR (PEDS[tw] AND development[tw]) OR (("developmental status"[tw] OR "developmental milestones"[tw]) AND parents[tw] AND evaluation[tw]) OR "PEDS:DM"[tw] OR (Denver[tiab] AND development\*[tw]) OR "Beery-Buktenica Developmental Test of Visual Motor Integration"[tw] OR "Beery-Buktenica"[tw] OR "Beery VMI"[tw] OR "Bayley Scales"[tw] OR "Bayley Scale"[tw] OR "Bayley III"[tw] OR "MacArthur-Bates Communicative Development Inventories"[tw] OR "MacArthur-Bates Communicative Development Inventory"[tw] OR (MacArthur[tiab] AND CDI[tiab]) OR "MB CDI"[tw] OR (CDI[tiab] AND words[tiab] AND (gestures[tiab] OR sentences[tiab])) OR "CDI-III"[tw] OR (("Communicative Development Inventories"[tw] OR "Communicative Development Inventory"[tw] OR "CDI"[tw] AND (Words[tw] OR Gestures[tw] OR Sentences[tw])) OR "CDI:WG"[tw] OR "CDI:WS"[tw] OR (wechsler[tiab] AND intelligence[tiab] AND scale\*) OR "WISC"[tw]) AND (income[MeSH Terms] OR social class[MeSH Terms] OR employment[MeSH Terms] OR educational measurement[MeSH Terms] OR ((income[tiab] OR employment[tiab] OR "academic achievement\*"[tiab] OR "educational achievement\*"[tiab] OR "educational measurement"[tiab] OR "school performance"[tiab] OR "social class"[tiab]) AND 2017:2018[pdat] NOT medline[sb])) AND (predict\*[tiab] OR estima\*[tiab] OR associat\*[tiab]) AND (child[MeSH Terms] OR adolescent[MeSH Terms] OR infant[MeSH Terms] OR child[tw] OR children[tw] OR adolescen\*[tw] OR juvenile\*[tw] OR infant[tw] OR infants[tw] OR youth[tw] OR youths[tw] OR teens[tw] OR teenage\*[tw] OR preschooler\*[tw]) AND (English[la] OR French[la] AND (("1990/01/01"[PDat] : "3000/12/31"[PDat])) NOT (Letter[pt] OR Editorial[pt] OR Review[pt] OR News[pt] OR Meta-Analysis[pt] OR Guideline[pt] OR Cross-Sectional Studies[MeSH Terms] OR Seroepidemiologic Studies[MeSH Terms] OR Controlled Before-After Studies[MeSH Terms])

## PSYCINFO SEARCH

(AB "Swedish Communicative Development Inventory III" OR AB "Kindergarten Student Entrance Profile-Adapted Version" OR AB "Environmental Symbols Instrument" OR AB "Representational Knowledge Assessment" OR AB "SEEK Observational Instrument" OR AB "Nonword Reading Task" OR AB "Kindergarten Readiness Checklist-Chinese Version" OR AB "Object-based Pattern Reasoning Assessment" OR AB "Australian English Communicative Development Inventory" OR AB "Child Performance Skills Questionnaire-Adapted" OR AB "Brief Early Skills and Support Index" OR AB "Picture Arrangement Test-Adapted Version" OR AB "Developmental Vocabulary Assessment for Parents" OR AB "Reading Strategy Performance Tests" OR AB "Functional Literacy Experience Scale based upon Ecological Theory" OR AB "Preschool Screening Measure" OR AB "Early Motor Questionnaire" OR AB "Comprehensive Test of Phonological Processing-Second Edition" OR AB "Letter Names Measure" OR AB "Brief Reading Rating Scale" OR AB "Brief Infant-Toddler Social and Emotional Assessment-Dutch Version" OR AB "Infant Toddler Home Observation for Measurement of the

Environment-Adapted Version" OR AB "Semantic Verbal Fluency Measure" OR AB "P1 Reading Assessments" OR AB "Reading Rating Form" OR AB "Colorado Learning Difficulties Questionnaire" OR AB "Reading Comprehension Test for Turkish Students" OR AB "Early Childhood Screening Assessment" OR AB "Woodcock-Johnson III Tests of Cognitive Abilities-Brazilian Version" OR AB "Screening Instrument for 3-Year-Olds" OR AB "BRIGANCE Comprehensive Inventory of Basic Skills II" OR AB "Lucknow Development Screen" OR AB "Screening Test for the Early Prediction of School Success" OR AB "Screening Test for the Early Prediction of School Success" OR AB "Capute Scales" OR AB "Middle-Childhood Home Observation for Measurement of the Environment Subscales" OR AB "Merrill-Palmer-Revised Scales of Development" OR AB "Woodcock Diagnostic Reading Battery" OR AB "Brief Academic Competence Evaluation Screening System" OR AB "Kindergarten Behavior Rating Scale" OR AB "Child Evaluation Measure" OR AB "Stoelting Brief Intelligence Test" OR AB "Cassle-DeMoulin Child Development Age Scale" OR AB "Icelandic Parent Report Checklist" OR AB "Infant-Toddler Development Assessment" OR AB "Icelandic Parent Development Inventory" OR AB "Computerized Neurocognitive Battery" OR AB "Child Development Inventory" OR AB "Parent Report Instrument" OR AB "Home Observation Measurement of the Environment Inventory-Elementary Version" OR AB "Teacher's Report Form" OR AB "Home Environment Questionnaire" OR AB "Preschool Rating Scale for Teachers" OR AB "Hayes Early Identification Listening Response Test" OR AB "Preschool Screener" OR AB "Utrecht" OR AB "Early Arithmetic, Reading and Learning" OR AB "Early Arithmetic Reading and Learning" OR AB "Mathematical Ability Instrument\*" OR AB "Early Mathematics Assessment\*" OR AB "iPad" OR AB "iPad Early Mathematics Assessment\*" OR AB "Nine-Card" OR AB "MindStreams" OR AB "Mind Streams" OR AB "tempe" OR AB "Head-Toes-Knees-Shoulders" OR AB "Executive Function Scale" OR AB "Wisconsin Card" OR AB "Behavioral Rating Inventory" OR AB "Child Behavior Rating Scale" OR AB "Hayling" OR AB "Attention and Impulse" OR AB "Emotional Regulation Checklist" OR AB "Dimensional Change Card Sort" OR AB "Family Life Project" OR AB "Differential Abilities Scale\*" OR AB "Batelle Development Inventory" OR AB "Rapid Neurodevelopment Assessment\*" OR AB "RNDA" OR AB "Kilifi Developmental Inventory" OR AB "Kilifi Communicative Development Inventories" OR AB "KDI" OR AB "Malawi Developmental Assessment Tool" OR AB "MDAT" OR AB "Ten Question Questionnaire\*" OR AB "Ten Questions Questionnaire\*" OR AB "International Guide for Monitoring Child Development" OR AB "Griffiths Mental Development Scales" OR AB GMDS OR (AB Griffiths AND AB scale\*) OR AB "Wechsler Preschool" OR (AB wechsler AND AB scale\*) OR AB "Stanford Binet" OR AB "Bracken Basic Concept Scale" OR AB "Peabody Picture Vocabulary Test" OR AB "Expressive Vocabulary Test" OR AB "Preschool Language Scale\*" OR AB "Receptive One-Word Picture Vocabulary Test\*" OR AB "Expressive One-Word Picture Vocabulary Test\*" OR AB "Child Behavior Checklist" OR AB "CBCL" OR AB "Behavior Assessment System" OR AB "BASC" OR (Conners Comprehensive Behaviour Rating Scale\*) OR (Conners Comprehensive Behavior Rating Scale\*) OR (AB conners AND AB rating AND AB scale\*) OR AB CBRS OR AB "Strengths and Difficulties Questionnaire" OR AB SDQ OR (AB vanderbilt AND AB assessment AND scale\*) OR (nichq AND (scale\* OR assessment)) OR AB "Behavior Rating Inventory of Executive Function" OR (AB Developmental AND AB neuropsychological AND AB Assessment) OR AB NEPSY OR AB "Bracken School Readiness Assessment" OR (AB bracken NOT (AB fern OR AB Pteridium OR AB bracken)) OR AB "BSRA" OR AB "Bracken Basic Concept Scale" OR AB BBCS OR (AB abc AND AB inventor\*) OR AB "Ages and Stages Questionnaire" OR AB ASQ OR ("ages and stages" AND questionnaire\*) OR AB "EASQ" OR AB "Parents Evaluation of Developmental Status" OR (AB PEDS AND AB development) OR ((AB "developmental status" OR AB "developmental milestones") AND AB parents AND AB evaluation) OR AB "PEDS:DM" OR (AB Denver AND AB development\*) OR AB "Beery-Buktenica Developmental Test of Visual Motor Integration" OR AB "Beery-Buktenica" OR AB "Beery VMI" OR AB "Bayley Scales" OR AB "Bayley Scale" OR AB "Bayley III" OR AB "MacArthur-Bates Communicative Development Inventories" OR AB "MacArthur-Bates Communicative Development

Inventory" OR (AB MacArthur AND AB CDI) OR AB "MB CDI" OR (AB CDI AND AB words AND (AB gestures OR AB sentences)) OR AB "CDI-III" OR ((AB "Communicative Development Inventories" OR AB "Communicative Development Inventory" OR AB "CDI") AND (AB Words OR AB Gestures OR AB Sentences)) OR AB "CDI:WG" OR AB "CDI:WS" OR (AB wechsler AND AB intelligence AND scale\*) OR AB "WISC") AND (DE "Income Level" OR DE "Salaries" OR DE "Socioeconomic Status" OR DE "Poverty" OR DE "Employment Status" OR "Social Class" OR DE "Educational Attainment Level" OR DE "Academic Achievement" OR "Academic Achievement Prediction") AND (AB predict\* OR AB estima\* OR AB associat\* OR Statistical Validity) AND (DE "Adolescents" OR DE "Children" OR DE "Early Adolescents" OR DE "Late Adolescents" OR DE "Youth" OR AB "children" OR AB adolescen\* OR AB juvenile\* OR AB infant\* OR AB youth\* OR AB "teens" OR AB teenage\* OR AB "Preschool Students") AND (LA English OR LA French) AND DT 1990-2018 AND (PT "Peer Reviewed Journal") NOT ("cross-sectional" OR "controlled before-after stud\*" OR "population survey" OR "population-based survey")

## ERIC SEARCH

(AB "Swedish Communicative Development Inventory III" OR AB "Kindergarten Student Entrance Profile-Adapted Version" OR AB "Environmental Symbols Instrument" OR AB "Representational Knowledge Assessment" OR AB "SEEK Observational Instrument" OR AB "Nonword Reading Task" OR AB "Kindergarten Readiness Checklist-Chinese Version" OR AB "Object-based Pattern Reasoning Assessment" OR AB "Australian English Communicative Development Inventory" OR AB "Child Performance Skills Questionnaire-Adapted" OR AB "Brief Early Skills and Support Index" OR AB "Picture Arrangement Test-Adapted Version" OR AB "Developmental Vocabulary Assessment for Parents" OR AB "Reading Strategy Performance Tests" OR AB "Functional Literacy Experience Scale based upon Ecological Theory" OR AB "Preschool Screening Measure" OR AB "Early Motor Questionnaire" OR AB "Comprehensive Test of Phonological Processing-Second Edition" OR AB "Letter Names Measure" OR AB "Brief Reading Rating Scale" OR AB "Brief Infant-Toddler Social and Emotional Assessment-Dutch Version" OR AB "Infant Toddler Home Observation for Measurement of the Environment-Adapted Version" OR AB "Semantic Verbal Fluency Measure" OR AB "P1 Reading Assessments" OR AB "Reading Rating Form" OR AB "Colorado Learning Difficulties Questionnaire" OR AB "Reading Comprehension Test for Turkish Students" OR AB "Early Childhood Screening Assessment" OR AB "Woodcock-Johnson III Tests of Cognitive Abilities-Brazilian Version" OR AB "Screening Instrument for 3-Year-Olds" OR AB "BRIGANCE" OR AB "Lucknow Development Screen" OR AB "Screening Test for the Early Prediction of School Success" OR AB "Screening Test for the Early Prediction of School Success" OR AB "Capute Scales" OR AB "Middle-Childhood Home Observation for Measurement of the Environment Subscales" OR AB "Merrill-Palmer-Revised Scales of Development" OR AB "Woodcock Diagnostic Reading Battery" OR AB "Brief Academic Competence Evaluation Screening System" OR AB "Kindergarten Behavior Rating Scale" OR AB "Child Evaluation Measure" OR AB "Stoelting Brief Intelligence Test" OR AB "Cassle-DeMoulin Child Development Age Scale" OR AB "Icelandic Parent Report Checklist" OR AB "Infant-Toddler Development Assessment" OR AB "Icelandic Parent Development Inventory" OR AB "Computerized Neurocognitive Battery" OR AB "Child Development Inventory" OR AB "Parent Report Instrument" OR AB "Home Observation Measurement of the Environment Inventory-Elementary Version" OR AB "Teacher's Report Form" OR AB "Home Environment Questionnaire" OR AB "Preschool Rating Scale for Teachers" OR AB "Hayes Early Identification Listening Response Test" OR AB "Preschool Screener" OR AB "Utrecht" OR AB "Early Arithmetic, Reading and Learning" OR AB "Early Arithmetic Reading and Learning" OR AB "Mathematical Ability Instrument\*" OR AB "Early Mathematics Assessment\*" OR AB "iPad" OR AB "iPad Early Mathematics Assessment\*" OR AB "Nine-Card" OR AB "MindStreams" OR AB "Mind Streams" OR AB "tempe" OR AB "Head-Toes-Knees-Shoulders" OR AB "Executive Function Scale" OR

AB "Wisconsin Card" OR AB "Behavioral Rating Inventory" OR AB "Child Behavior Rating Scale" OR AB "Hayling" OR AB "Attention and Impulse" OR AB "Emotional Regulation Checklist" OR AB "Dimensional Change Card Sort" OR AB "Family Life Project" OR AB "Differential Abilities Scale\*" OR AB "Batelle Development Inventory" OR AB "Rapid Neurodevelopment Assessment\*" OR AB "RNDA" OR AB "Kilifi Developmental Inventory" OR AB "Kilifi Communicative Development Inventories" OR AB "KDI" OR AB "Malawi Developmental Assessment Tool" OR AB "MDAT" OR AB "Ten Question Questionnaire\*" OR AB "Ten Questions Questionnaire\*" OR AB "International Guide for Monitoring Child Development" OR AB "Griffiths Mental Development Scales" OR AB GMDS OR (AB Griffiths AND AB scale\*) OR AB "Wechsler Preschool" OR (AB wechsler AND AB scale\*) OR AB "Stanford Binet" OR AB "Bracken Basic Concept Scale" OR AB "Peabody Picture Vocabulary Test" OR AB "Expressive Vocabulary Test" OR AB "Preschool Language Scale\*" OR AB "Receptive One-Word Picture Vocabulary Test\*" OR AB "Expressive One-Word Picture Vocabulary Test\*" OR AB "Child Behavior Checklist" OR AB "CBCL" OR AB "Behavior Assessment System" OR AB "BASC" OR (Conners Comprehensive Behaviour Rating Scale\*) OR (Conners Comprehensive Behavior Rating Scale\*) OR (AB conners AND AB rating AND AB scale\*) OR AB CBRS OR AB "Strengths and Difficulties Questionnaire" OR AB SDQ OR (AB vanderbilt AND AB assessment AND scale\*) OR (nichq AND (scale\* OR assessment)) OR AB "Behavior Rating Inventory of Executive Function" OR (AB Developmental AND AB neuropsychological AND AB Assessment) OR AB NEPSY OR AB "Bracken School Readiness Assessment" OR (AB bracken NOT (AB fern OR AB Pteridium OR AB bracken)) OR AB "BSRA" OR AB "Bracken Basic Concept Scale" OR AB BBCS OR (AB abc AND AB inventor\*) OR AB "Ages and Stages Questionnaire" OR AB ASQ OR ("ages and stages" AND questionnaire\*) OR AB "EASQ" OR AB "Parents Evaluation of Developmental Status" OR (AB PEDS AND AB development) OR ((AB "developmental status" OR AB "developmental milestones") AND AB parents AND AB evaluation) OR AB "PEDS:DM" OR (AB Denver AND AB development\*) OR AB "Beery-Buktenica Developmental Test of Visual Motor Integration" OR AB "Beery-Buktenica" OR AB "Beery VMI" OR AB "Bayley Scales" OR AB "Bayley Scale" OR AB "Bayley III" OR AB "MacArthur-Bates Communicative Development Inventories" OR AB "MacArthur-Bates Communicative Development Inventory" OR (AB MacArthur AND AB CDI) OR AB "MB CDI" OR (AB CDI AND AB words AND (AB gestures OR AB sentences)) OR AB "CDI-III" OR ((AB "Communicative Development Inventories" OR AB "Communicative Development Inventory" OR AB "CDI") AND (AB Words OR AB Gestures OR AB Sentences)) OR AB "CDI:WG" OR AB "CDI:WS" OR (AB wechsler AND AB intelligence AND scale\*) OR AB "WISC") AND (DE "Income" OR DE "Salaries" OR DE "Wages" OR DE "Economic Status" OR DE "Poverty" OR DE "Employment Level" OR "Social Class" OR DE "Socioeconomic Status" OR DE "Educational Attainment" OR DE "Academic Achievement" OR DE "Educational Attainment") AND (AB predict\* OR AB estima\* OR AB associat\*) AND (DE "Adolescents" OR DE "Children" OR DE "Early Adolescents" OR DE "Late Adolescents" OR DE "Youth" OR AB children OR AB adolescen\* or AB juvenile\* or AB infant OR AB infants OR AB youth OR AB youths OR AB teens OR AB teenage\* OR AB preschooler\*) AND (LA English OR LA French) AND DT 1990-2018 NOT ("cross-sectional" OR "controlled before-after stud\*" OR "population survey" OR "population-based survey")

**SUPPLEMENTAL TABLE 1.** Child development assessment tools included in search string

|                                                                   |                                                                                                                        |
|-------------------------------------------------------------------|------------------------------------------------------------------------------------------------------------------------|
| 1. Ages and Stages Questionnaire                                  | 28. Computerized Neurocognitive Battery                                                                                |
| 2. Australian English Communicative Development Inventory         | 29. Conners Comprehensive Behaviour Rating Scale                                                                       |
| 3. Batelle Development Inventory                                  | 30. Denver Developmental Screening Test                                                                                |
| 4. Bayley Scales of Infant and Toddler Development                | 31. Denver II                                                                                                          |
| 5. Beery-Buktenica Developmental Test of Visual Motor Integration | 32. Developmental NEuroPSYchological Assessment (NEPSY)                                                                |
| 6. Behavior Assessment System for Children (BASC)                 | 33. Developmental Vocabulary Assessment for Parents                                                                    |
| 7. Behavior Rating Inventory of Executive Function (BRIEF)        | 34. Differential Abilities Scale                                                                                       |
| 8. Bracken Basic Concept Scale                                    | 35. Dimensional Change Card Sort                                                                                       |
| 9. Bracken School Readiness Assessment                            | 36. Early Arithmetic Reading and Learning                                                                              |
| 10. Brief Academic Competence Evaluation Screening System         | 37. Early Childhood Screening Assessment                                                                               |
| 11. Brief Early Skills and Support Index                          | 38. Early Mathematics Assessment                                                                                       |
| 12. Brief Infant-Toddler Social and Emotional Assessment          | 39. Early Motor Questionnaire                                                                                          |
| 13. Brief Reading Rating Scale                                    | 40. Emotional Regulation Checklist                                                                                     |
| 14. BRIGANCE Comprehensive Inventory of Basic Skills II           | 41. Environmental Symbols Instrument                                                                                   |
| 15. Capute Scales                                                 | 42. Executive Function Scale                                                                                           |
| 16. Cassle-DeMoulin Child Development Age Scale                   | 43. Expressive One-Word Picture Vocabulary Test                                                                        |
| 17. Child Behavior Checklist – Parent-Report Form                 | 44. Expressive Vocabulary Test                                                                                         |
| 18. Child Behavior Checklist – Teacher-Report Form                | 45. Extended Ages and Stages Questionnaire                                                                             |
| 19. Child Behavior Checklist – Youth Self-Report                  | 46. Family Life Project                                                                                                |
| 20. Child Behavior Rating Scale                                   | 47. Functional Literacy Experience Scale based upon Ecological Theory                                                  |
| 21. Child Development Inventory                                   | 48. Griffiths Mental Development Scales                                                                                |
| 22. Child Evaluation Measure                                      | 49. Hayes Early Identification Listening Response Test                                                                 |
| 23. Child Hayling Test                                            | 50. Head-Toes-Knees-Shoulders                                                                                          |
| 24. Child Performance Skills Questionnaire-Adapted                | 51. Home Environment Questionnaire                                                                                     |
| 25. Colorado Learning Difficulties Questionnaire                  | 52. Home Observation Measurement of the Environment Inventory-Elementary Version                                       |
| 26. Communicative Development Inventories                         | 53. Icelandic Parent Development Inventory                                                                             |
| 27. Comprehensive Test of Phonological Processing–Second Edition  | 54. Icelandic Parent Report Checklist                                                                                  |
|                                                                   | 55. Infant Toddler Home Observation for Measurement of the Environment-Adapted Version Semantic Verbal Fluency Measure |
|                                                                   | 56. Infant-Toddler Development Assessment                                                                              |
|                                                                   | 57. International Guide for Monitoring Child Development                                                               |

|                                                                          |
|--------------------------------------------------------------------------|
| 58. Kilifi Communicative Development Inventories                         |
| 59. Kindergarten Behavior Rating Scale                                   |
| 60. Kindergarten Readiness Checklist                                     |
| 61. Kindergarten Student Entrance Profile-Adapted Version                |
| 62. Letter Names Measure                                                 |
| 63. Lucknow Development Screen                                           |
| 64. MacArthur-Bates Communicative Development Inventories                |
| 65. Malawi Developmental Assessment Tool                                 |
| 66. Mathematical Ability Instrument                                      |
| 67. Merrill-Palmer-Revised Scales of Development                         |
| 68. Middle-Childhood Home Observation for Measurement of the Environment |
| 69. MindStreams Expanded Go-NoGo Response Inhibition                     |
| 70. Mullen Scales of Early Learning                                      |
| 71. NICHQ Vanderbilt Assessment Scales                                   |
| 72. Nine-Card Sorting Test                                               |
| 73. Nonword Reading Task                                                 |
| 74. Object-based Pattern Reasoning Assessment                            |
| 75. P1 Reading Assessments                                               |
| 76. Parent Report Instrument                                             |
| 77. Parents Evaluation of Developmental Status                           |
| 78. Peabody Picture Vocabulary Test                                      |
| 79. Picture Arrangement Test-Adapted Version                             |
| 80. Preschool Language Scale                                             |
| 81. Preschool Rating Scale for Teachers                                  |
| 82. Preschool Screener                                                   |
| 83. Preschool Screening Measure                                          |
| 84. Rapid Neurodevelopment Assessment                                    |
| 85. Reading Comprehension Test for Turkish Students                      |
| 86. Reading Rating Form                                                  |
| 87. Reading Strategy Performance Tests                                   |
| 88. Receptive One-Word Picture Vocabulary Test                           |

|                                                                          |
|--------------------------------------------------------------------------|
| 89. Representational Knowledge Assessment                                |
| 90. Screening Instrument for 3-Year-Olds                                 |
| 91. Screening Test for the Early Prediction of School Success            |
| 92. SEEK Observational Instrument                                        |
| 93. Stanford-Binet Intelligence Scales                                   |
| 94. Stoelting Brief Intelligence Test                                    |
| 95. Strengths and Difficulties Questionnaire                             |
| 96. Swedish Communicative Development Inventory III                      |
| 97. Teacher-Rated Children's Attention and Impulse Control Questionnaire |
| 98. Ten Question Questionnaire                                           |
| 99. Utrecht Early Mathematical Competence Scales                         |
| 100. Wechsler Intelligence Scale for Children (WISC)                     |
| 101. Wechsler Preschool & Primary Scale of Intelligence (WPPSI)          |
| 102. Wisconsin Card Sorting Test                                         |
| 103. Woodcock Diagnostic Reading Battery                                 |
| 104. Woodcock-Johnson III Tests of Cognitive Abilities                   |



**SUPPLEMENTAL TABLE 2.** Details of studies included in the review

| Reference<br>Study design<br>& population                                                                                               | Sample<br>size        | Assessment tool                                                                     | Assessment<br>age | Outcome<br>Measure                                                        | Outcome<br>age | Duration of<br>follow-up | Effect measure                                                                                                                                                                                                                                                                                                                                                                      |
|-----------------------------------------------------------------------------------------------------------------------------------------|-----------------------|-------------------------------------------------------------------------------------|-------------------|---------------------------------------------------------------------------|----------------|--------------------------|-------------------------------------------------------------------------------------------------------------------------------------------------------------------------------------------------------------------------------------------------------------------------------------------------------------------------------------------------------------------------------------|
| <b>Clarren, 1993</b><br>Retrospective<br>cohort,<br>Pacific<br>Northwest of<br>U.S.                                                     | Kindergart<br>en: 102 | Wechsler Intelligence<br>Scales for Children<br>(WISC) Verbal and<br>Performance IQ | 5 years           | <b>Achievement:</b><br>Standardized<br>Achievement<br>Tests               | 14-15<br>years | 10 years                 | IQ model regression estimate for total<br>achievement in Grade 9: 0.56**                                                                                                                                                                                                                                                                                                            |
|                                                                                                                                         |                       | Reitan-Indiana<br>Neuropsychological<br>Battery for Children                        |                   |                                                                           |                |                          | Neuropsychological model regression estimate<br>for total achievement in Grade 9: 0.63**                                                                                                                                                                                                                                                                                            |
|                                                                                                                                         | 2nd grade:<br>113     | Wechsler Intelligence<br>Scales for Children<br>(WISC) Verbal and<br>Performance IQ | 8 years           | <b>Achievement:</b><br>Standardized<br>Achievement<br>Tests               | 14-15<br>years | 8 years                  | IQ model regression estimate for total<br>achievement in Grade 9: 0.51*                                                                                                                                                                                                                                                                                                             |
|                                                                                                                                         |                       | Reitan-Indiana<br>Neuropsychological<br>Battery for Children                        |                   |                                                                           |                |                          | Neuropsychological model regression estimate<br>for total achievement in Grade 9: 0.63**                                                                                                                                                                                                                                                                                            |
| <b>Richards 1995</b><br>Prospective<br>cohort,<br>Children with<br>learning<br>disabilities in<br>a private<br>residential<br>school in | 20                    | Child Behavior<br>Checklist, Children's<br>Assessment and<br>Adjustment Survey      | 11-17 years       | <b>Achievement:</b><br>WRAT-R<br>Reading,<br>Spelling, and<br>Math Scores | 11-17<br>years | 1-2 years                | <u>Teacher report of externalizing behavior:</u><br>Reading regression coefficient: -0.57*<br>Spelling regression coefficient: - 0.55**<br>Math regression coefficient:<br>-0.33 N.S.<br><br><u>Parent report of externalizing behavior:</u><br>Reading regression coefficient: -0.26 N.S.<br>Spelling regression coefficient: 0.05 N.S.<br>Math regression coefficient: -0.28 N.S. |

|                                                                                                                                             |                            |                                                                 |               |                                                                                                               |                 |             |                                                                                                                                                                                                                  |
|---------------------------------------------------------------------------------------------------------------------------------------------|----------------------------|-----------------------------------------------------------------|---------------|---------------------------------------------------------------------------------------------------------------|-----------------|-------------|------------------------------------------------------------------------------------------------------------------------------------------------------------------------------------------------------------------|
| Atlantic<br>Canada                                                                                                                          |                            |                                                                 |               |                                                                                                               |                 |             |                                                                                                                                                                                                                  |
| <b>Lamp 2001</b><br>Prospective<br>cohort,<br>Children from<br>impoverished<br>families in the<br>U.S.                                      | Phase 1: 67                | Stanford-Binet<br>Intelligence Scale: LM<br>(SB:LM)             | 4 years       | <b>Achievement:</b><br>Metropolitan<br>Achievement<br>Test                                                    | 5 - 10<br>years | 1-5 years   | Correlation coefficient kindergarten to 6 <sup>th</sup><br>grade: 0.39**                                                                                                                                         |
|                                                                                                                                             | Phase 1: 67<br>Phase 2: 59 | Stanford-Binet<br>Intelligence Scale:<br>Fourth Edition (SB:FE) | 4, 6, 9 years |                                                                                                               |                 |             | Correlation coefficient kindergarten to 6 <sup>th</sup><br>grade: 0.47**<br><br>Correlation 1 <sup>st</sup> to 6 <sup>th</sup> grade: 0.52**<br><br>Correlation 4 <sup>th</sup> to 6 <sup>th</sup> grade: 0.62** |
| <b>Fergusson<br/>2005</b><br>Retrospective<br>cohort,<br>Participants of<br>Christchurch<br>Child<br>Development<br>Study in New<br>Zealand | 1265                       | Wechsler Intelligence<br>Scales for Children-<br>Revised        | 8-9 years     | <b>Wealth:</b> Gross<br>income (\$) during past 12<br>months & rates<br>of<br>unemployment<br>(18-25 years)   | 18-25<br>years  | 10-17 years | Regression coefficient gross income: 1.595*                                                                                                                                                                      |
|                                                                                                                                             |                            |                                                                 |               | <b>Attainment:</b><br>Educational<br>Outcomes (18<br>years) &<br>gained<br>university<br>degree (25<br>years) |                 |             | Regression coefficient duration of<br>unemployment: -0.14*<br><br>Regression coefficient gained school<br>qualifications: .82**<br><br>Regression coefficient gained university<br>degree: 0.67 **               |

|                                                                                                                            |      |                                                      |                                               |                                                                          |                |             |                                                                                                                        |
|----------------------------------------------------------------------------------------------------------------------------|------|------------------------------------------------------|-----------------------------------------------|--------------------------------------------------------------------------|----------------|-------------|------------------------------------------------------------------------------------------------------------------------|
| <b>Rothon 2009</b><br>Prospective cohort,<br>School-based cohort in East London                                            | 1718 | Strengths and Difficulties Questionnaire (SDQ)       | 13-14 years                                   | <b>Achievement:</b><br>General Certificate of Secondary Education Scores | 15-16 years    | 2 years     | <u>Odds of receiving 5 or more A*-C grades given psychological distress:</u><br>OR boys: 0.41**<br>OR girls: 0.60**    |
|                                                                                                                            |      | Short Moods and Feelings Questionnaire (SMFQ)        |                                               |                                                                          |                |             | <u>Odds of receiving 5 or more A*-C grades given psychological distress:</u><br>OR boys: 0.58**<br>OR girls: 0.83 N.S. |
| <b>Moffitt 2011</b><br>Prospective cohort,<br>Dunedin Multidisciplinary Health and Development Study cohort in New Zealand | 1037 | Wechsler Intelligence Scales for Children-Revised    | 7,9,11 years averaged and standardized scores | <b>Wealth:</b> SES                                                       | 32 years       | 21-29 years | SES regression estimate:<br>-0.400*                                                                                    |
|                                                                                                                            |      |                                                      |                                               | <b>Wealth:</b> Income                                                    |                |             | Income regression estimate:<br>-0.291*                                                                                 |
|                                                                                                                            |      |                                                      |                                               | <b>Wealth:</b> Financial issues                                          |                |             | Financial planfulness regression estimate: -0.160*<br><br>Financial struggles regression estimate: 0.029*              |
| <b>McClelland 2013</b><br>Prospective cohort,<br>Colorado Adoption Project cohort                                          | 286  | Peabody Picture Vocabulary Test                      | 4 years                                       | <b>Attainment:</b><br>College completion age 25                          | 21 or 25 years | >17 years   | OR college completion age 25 regression estimate: 1.03 (N.S.)                                                          |
|                                                                                                                            |      | Peabody Individual Achievement Test-Reading subscale | 7 years                                       | <b>Attainment:</b><br>College completion age 25                          |                |             | College completion age 25 correlation coefficient: 0.16*                                                               |

|                                                                                                                  |        |                                                                       |             |                                                                   |             |         |                                                                                                                                                                                                                                                                                                                                                                                                                                                                                                                                                            |
|------------------------------------------------------------------------------------------------------------------|--------|-----------------------------------------------------------------------|-------------|-------------------------------------------------------------------|-------------|---------|------------------------------------------------------------------------------------------------------------------------------------------------------------------------------------------------------------------------------------------------------------------------------------------------------------------------------------------------------------------------------------------------------------------------------------------------------------------------------------------------------------------------------------------------------------|
|                                                                                                                  |        | Wechsler Intelligence Scales for Children-Revised Arithmetic subscale | 7 years old | <b>Attainment:</b><br>college completion age 25                   |             |         | College completion age 25 correlation coefficient: 0.13*                                                                                                                                                                                                                                                                                                                                                                                                                                                                                                   |
| <b>Sagatun 2014</b><br>Retrospective cohort, Students in academic and vocational schools from Norwegian registry | 10,931 | Strengths and Difficulties Questionnaire                              | 15-16 years | <b>Attainment:</b><br>National registry of school completion      | 20-21 years | 5 years | <u>Odds of non-completion given externalizing problems:</u><br>OR boys: 1.38***<br>OR: 1.48***<br><br><u>Odds of non-completion given internalizing problems:</u><br>OR boys: 1.11***<br>OR girls: 1.21***                                                                                                                                                                                                                                                                                                                                                 |
| <b>Veldman 2014</b><br>Prospective cohort, Dutch cohort from the Tracking Adolescents' Individual Lives Survey   | 1,711  | Youth Self Report & Child Behavior Checklist (Combined)               | 15-16 years | <b>Attainment:</b><br>Self-report of years of schooling completed | 19 years    | 8 years | <u>Odds of low vs. medium educational attainment:</u><br>OR externalizing problems: 1.70**<br>OR internalizing problems: 1.32 N.S.<br>OR attention problems: 1.78**<br><br><u>Odds of medium vs. high educational attainment:</u><br>OR externalizing problems: 1.56**<br>OR internalizing problems 1.25 NS<br>OR attention problems: 1.53**<br><br><i>Note: low (primary, lower vocational and lower secondary education), medium (intermediate vocational and intermediate secondary), and high (higher secondary, higher vocational and university)</i> |

|                                                                                                                                                                              |            |                                                                                                   |                     |                                                            |                    |                |                                                                                                                                                                                                                                                                                                                                                                                                                                                                                                                                                                          |
|------------------------------------------------------------------------------------------------------------------------------------------------------------------------------|------------|---------------------------------------------------------------------------------------------------|---------------------|------------------------------------------------------------|--------------------|----------------|--------------------------------------------------------------------------------------------------------------------------------------------------------------------------------------------------------------------------------------------------------------------------------------------------------------------------------------------------------------------------------------------------------------------------------------------------------------------------------------------------------------------------------------------------------------------------|
| <p><b>Samuels 2016</b><br/>Prospective cohort,<br/>Urban charter school in New York City</p>                                                                                 | <p>322</p> | <p>Behavior Rating Inventory of Executive Function (BRIEF) By Teacher and Teacher's Assistant</p> | <p>12-15 years</p>  | <p><b>Achievement:</b><br/>School grade point averages</p> | <p>12-15 years</p> | <p>4 years</p> | <p><u>Teacher report:</u><br/>English and language arts regression coefficient: -0.47*<br/>Math regression coefficient: -0.53*<br/>Science regression coefficient: -0.50 N.S.<br/>Social studies regression coefficient: 0.56*<br/>Spanish regression coefficient: -0.41*</p> <p><u>Teacher's assistant report:</u><br/>English and language arts regression coefficient: -0.33*<br/>Math regression coefficient: -0.47*<br/>Science regression coefficient: -0.59 N.S.<br/>Social studies regression coefficient: -0.52*<br/>Spanish regression coefficient: -0.43*</p> |
| <p><b>Gygi 2017</b><br/>Prospective cohort,<br/>Elementary school children in German-speaking Switzerland</p>                                                                | <p>103</p> | <p>Wechsler Intelligence Scale for Children - Fourth Edition</p>                                  | <p>6 - 11 years</p> | <p><b>Achievement:</b><br/>Self-reported school grades</p> | <p>9 -14 years</p> | <p>3 years</p> | <p>Average school grade regression estimate: 0.128**</p> <p>Math school grades regression estimate: 0.242 (N.S.)</p> <p>Language school grades regression estimate: 0.260**</p> <p><i>Adjustment for sex and age</i></p>                                                                                                                                                                                                                                                                                                                                                 |
| <p>OR odds ratio; N.S. Not statistically significant at <math>p &lt; 0.05</math>; * <math>p &lt; 0.05</math>; ** <math>p &lt; 0.01</math>; *** <math>p &lt; 0.001</math></p> |            |                                                                                                   |                     |                                                            |                    |                |                                                                                                                                                                                                                                                                                                                                                                                                                                                                                                                                                                          |
